# Supplementary material for: A Novel Regulated Hybrid Promoter That Permits Autoinduction of Heterologous Protein Expression in Kluyveromyces lactis
Source: PubMed Central journal article supplement (PMC6606884; doi:10.1128/aem.00542-19), 2019-07-01
Supplement: AEM.00542-19-s0001.pdf [file AEM.00542-19-s0001.pdf]

## Supplemental Material

### **A novel regulated hybrid promoter that permits auto-induction of heterologous protein expression in *Kluyveromyces lactis***

Hassan Sakhtah<sup>1\*</sup>, Juliane Behler<sup>1,2\*</sup>, Alana Ali-Reynolds<sup>1</sup>, Thomas B. Causey<sup>1</sup>, Saulius Vainauskas<sup>1‡</sup> and Christopher H. Taron<sup>1‡§</sup>

\*Authors contributed equally to this work

‡Authors share senior authorship

<sup>1</sup> New England Biolabs, 240 County Road, Ipswich, MA 01938, USA

<sup>2</sup>Genetics & Experimental Bioinformatics, University of Freiburg, Institute of Biology III, Schänzlestraße 1, D-79104 Freiburg, Germany

§Corresponding author. Email: taron@neb.com

**This document provides information (tables and figures) supplemental to the main text**

**Table S1. DNA primers used in this study.**

| Primer Description                         | <sup>1</sup> Name                                                    | <sup>2</sup> Sequence 5' - 3'                                                                                                                                                                                                                                      |
|--------------------------------------------|----------------------------------------------------------------------|--------------------------------------------------------------------------------------------------------------------------------------------------------------------------------------------------------------------------------------------------------------------|
| <i>KIADH3</i> expression cassette assembly | ADH3_S1A<br>ADH3_S1B<br>ADH3_S1C<br>ADH3_S1H<br>ADH3_S1I<br>ADH3_S1J | cgttgtaaaacgacggccagtgaaattCAAACCCGTAGTGATGCAC<br>gagaatttcatCTTAATATTTCTTGTTTTAAATTTGATGGG<br>gaaatattaagATGAAATTTCTCTACTATATTAGCCG<br>ccatccgaaatCTATGGAGTCACCACATTTTC<br>tgactccatagATTTTCGGATGGGTGCTTG<br>ggatccccgggtaccgagctcgaattcATGTAGAACTCCGATTTTACATC   |
| <i>KIGAP1</i> expression cassette assembly | GAP1_S1A<br>GAP1_S1B<br>GAP1_S1C<br>GAP1_S1H<br>GAP1_S1I<br>GAP1_S1J | cgttgtaaaacgacggccagtgaaattcACCTCGGAAGATTTCCCAATTAC<br>gagaatttcatTGTGTAATATTTCTTTTTTTTACTTGAAACTG<br>aatattacacaATGAAATTTCTCTACTATATTAGCCG<br>tcggtactgacCTATGGAGTCACCACATTTTC<br>tgactccatagGTCAGTACCGACTGGGATC<br>ggatccccgggtaccgagctcgaattcAGTATGACATGTCCGGTG |
| <i>KIGUT2</i> expression cassette assembly | GUT2_S1A<br>GUT2_S1B<br>GUT2_S1C<br>GUT2_S1H<br>GUT2_S1I<br>GUT2_S1J | cgttgtaaaacgacggccagtgaaattCCATCAACCCAGACAAAAAC<br>gagaatttcatCGTTTGTAACTGTGAGCG<br>gtttacaaacgATGAAATTTCTCTACTATATTAGCCG<br>tcggtcagcagCTATGGAGTCACCACATTTTC<br>tgactccatagCTGCTGAACGAAAAAATTAAGG<br>ggatccccgggtaccgagctcgaattcGTTTTGTTTTGCGTGGTTTTG             |
| <i>KIICL1</i> expression cassette assembly | ICL1_S1A<br>ICL1_S1B<br>ICL1_S1C<br>ICL1_S1H<br>ICL1_S1I<br>ICL1_S1J | cgttgtaaaacgacggccagtgaaattcATCTAGATAATCGGGTATGATTAAC<br>gagaatttcatTATGTTGGGTTTGTATGTTTTG<br>aaccacaacataATGAAATTTCTCTACTATATTAGCCG<br>aaaggtaaaagCTATGGAGTCACCACATTTTC<br>tgactccatagCTTTTACCTTTGTTGTCTTATGTG<br>ggatccccgggtaccgagctcgaattcGCAGATTAGGTGAGCTTAC  |
| <i>KISTR3</i> expression cassette assembly | STR3_S1A<br>STR3_S1B<br>STR3_S1C<br>STR3_S1H<br>STR3_S1I<br>STR3_S1J | cgttgtaaaacgacggccagtgaaattcTAACTAAATCAAAGTTGACTTAATC<br>gagaatttcatGTTGGAAGTTTATTGTTGG<br>aaactccaacATGAAATTTCTCTACTATATTAGCCG<br>ttatgaagcctCTATGGAGTCACCACATTTTC<br>tgactccatagAGCCTTCATAATATTACTGGAC<br>ggatccccgggtaccgagctcgaattCTACCTTACTGGTGAACCTTG        |
| <i>KILAC4</i> expression cassette assembly | LAC4_S1A<br>LAC4_S1B<br>LAC4_S1C<br>LAC4_S1H<br>LAC4_S1I<br>LAC4_S1J | cgttgtaaaacgacggccagtgaaattcGATCGACTCATAAAATAGTAACC<br>gagaatttcatTTTTTCAAGCTTCTCGATG<br>gctgaaaaaaaATGAAATTTCTCTACTATATTAGCCG<br>atctgtccttCTATGGAGTCACCACATTTTC<br>tgactccatagAAGGAACAGATAGATAAAATTCGG<br>ggatccccgggtaccgagctcgaattCCGCGGAAATTTAGGAATTTAAAC     |
| Expression cassette assembly               | S1D<br>S1E<br>S1F<br>S1G                                             | aaggggctgtTCTTTTCTCGAGATCATCC<br>tcgagaaaaagaACAGGCCCTTTTCTTTGTGCG<br>caccggaaacAGCTTGCAAATTAAGCCTTC<br>atgtcaagctGTTTCCGGGTGTACAATATG                                                                                                                             |
| Promoter specific backbone amplification   | S2K<br>S2L                                                           | ACAGGCCCTTTTCTTTGTGCG<br>TCTTTTCTCGAGATCATCCTTGTGTCAG                                                                                                                                                                                                              |
| Gaussia luciferase                         | Gluc_S2M<br>Gluc_S2N                                                 | gacaaggatgatctcgagaaaagaAAGCCCACCGAGAACAACGAAG<br>atcgacaaaggaaggggctgtTAGTCACCACCGGCCCTTG                                                                                                                                                                         |
| Fucosidase                                 | Fuc_S2M<br>Fuc_S2N                                                   | gacaaggatgatctcgagaaaagaTCATCATCATCATCATTACC<br>atcgacaaaggaaggggctgtTCAGATAGCAGATATTTGTGAATG                                                                                                                                                                      |
| Enterokinase                               | EK_S2M<br>EK_S2N                                                     | gacaaggatgatctcgagaaaagaATTGTTGGTGGTTCTGATTCT<br>atcgacaaaggaaggggctgtCTAATGTAGAAAATTTGTATC                                                                                                                                                                        |
| Expression cassette amplification primers  | S3O<br>S3P                                                           | TATTACGCCAGCTGGCGAAAG<br>GTGAGCGGATAACAATTTACACACAGG                                                                                                                                                                                                               |
| pUC19/ICL1 partial backbone for fusion     | PICL1(-680)_rev<br>PICL1_ amdS_fwd                                   | GGCTGAGGAACCAATAGAGTC<br>TGTTTTCCGGGTGACAATATGG                                                                                                                                                                                                                    |
| P1000 promoter                             | PICL1_PGAP1_fwd<br>PICL1_PGAP1_rev                                   | atgtgtcctcagccACCTCGGAAGATTTCCCAATTAC<br>tgtacaccggaaacaAGCTTGCAAATTAAGCCTTCG                                                                                                                                                                                      |
| P500 promoter                              | PGAP1-500fusion_fwd<br>PGAP1-500fusion_rev                           | gactctatttggtcctcagccTGGACAGGAAGAGAAAATC<br>ctaataatagtagaatttcatTGTGTAATATTCTTTTTTTTACTTGAAC                                                                                                                                                                      |
| P450 promoter                              | PGAP1-450_fusion_fwd                                                 | gactctatttggtcctcagccACTTTCACCAGATCCCAATG                                                                                                                                                                                                                          |
| P400 promoter                              | PGAP1-400_fusion_fwd                                                 | gactctatttggtcctcagccTACCATAACTTACCATTTTCATCAC                                                                                                                                                                                                                     |
| P350 promoter                              | PGAP1-350_fusion_fwd                                                 | gactctatttggtcctcagccTCGACTGCTTTGCTTCATC                                                                                                                                                                                                                           |
| P220 promoter                              | PGAP1-220_fusion_fwd                                                 | gactctatttggtcctcagccTAATTTTGTATATAAAGGGTGGATC                                                                                                                                                                                                                     |
| P125 promoter                              | PGAP1-125_fusion_fwd                                                 | gactctatttggtcctcagccTTCTTATTAACCTTTTTTAAAGTCAAAC                                                                                                                                                                                                                  |
| P74 promoter                               | PGAP1-74_fusion_fwd                                                  | gactctatttggtcctcagccCAAAGGTATTTCAAGTTATCATAC                                                                                                                                                                                                                      |

<sup>1</sup>Primers correlate to specific expression vector cloning steps outlined in Figure S1. Primers with S1, S2 or S3 in their name pertain to cloning steps 1, 2 or 3, respectively. The letter immediately following denotes the exact location of the primer within that schematic.

For example, EK-S2M and EK-S2N that are used in Step 2 of the cloning strategy, anneal to locations M and N, and are used to amplify DNA encoding enterokinase. P### primers were used to prepare truncated PICL1-PGAP fusion promoters.

<sup>2</sup>Uppercase letters represent insert-specific DNA sequences; lowercase letters are sequences that overlap with the vector backbone or an adjacent DNA region.

### Step 1: first round of PCR and *in-vitro* assembly

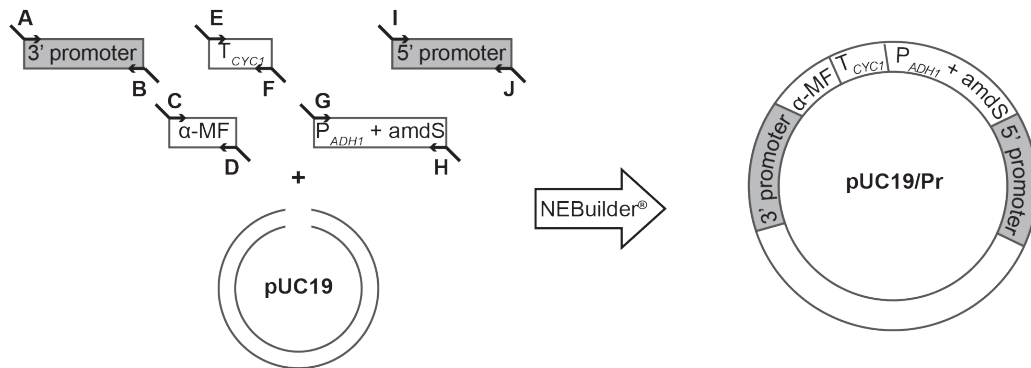

### Step 2: second round of PCR and *in-vitro* assembly

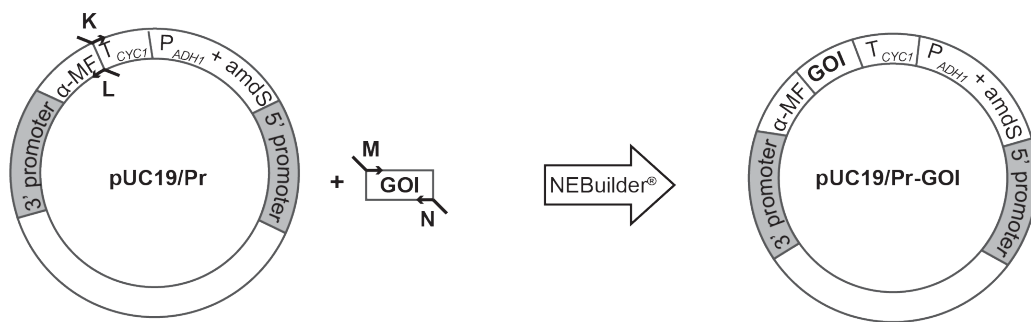

### Step 3: final round of PCR to generate linear expression cassette

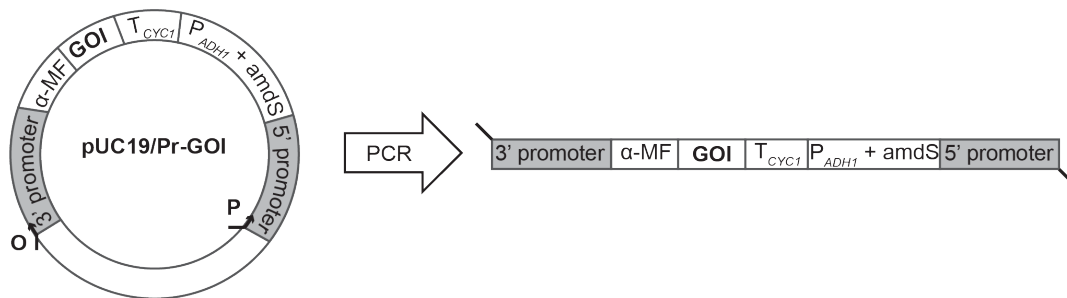

**Figure S1. Assembly of *K. lactis* expression cassettes *in vitro*.** (Step 1) Different promoters used in this study (3' Promoter) and their flanking upstream regions needed for homologous recombination (5' Promoter) were amplified from *K. lactis* GG779 genomic DNA. *Saccharomyces cerevisiae* YJM193 genomic DNA was used for the amplification of the *CYC1* transcription terminator sequence ( $T_{CYC1}$ ). The pKLAC2 vector (NEB, Ipswich, MA) was used as template for amplifying the *Aspergillus nidulans* acetamidase expression cassette ( $P_{ADH1} + amdS$ ) and *K. lactis*  $\alpha$ -mating factor secretion leader sequence ( $\alpha$ -MF). Primers were designed to create homologous overlaps between the different fragments (black arrows) and the letters (A to P) denoting each primer correspond to primer sequences presented in Table S1. The EcoRI digested vector pUC19 was used to assemble individual expression constructs. The fragments were assembled *in vitro* into EcoRI-linearized pUC19 plasmid DNA using NEBuilder® HiFi DNA Assembly Master Mix, resulting in a plasmid pUC19/Pr. (Step 2) DNA fragments from a reporter gene of interest (GOI) and from pUC19/Pr were amplified by PCR (both using primers with homologous overlaps) and assembled to create a new plasmid containing a complete integrative expression cassette. (Step 3) A linear integrative expression cassette was prepared by PCR using specific primers and the assembled plasmid from Step 2 as a DNA template. This linear cassette was used for integrative transformation of *K. lactis* cells.

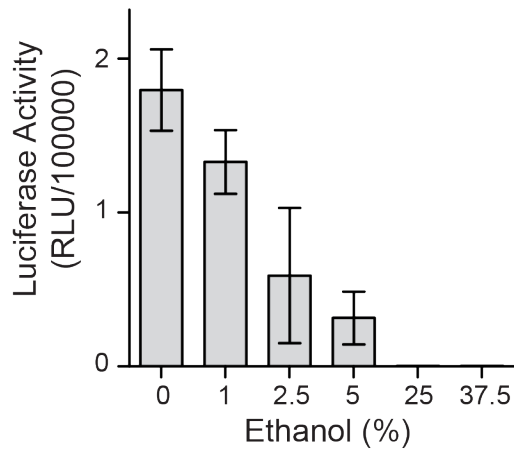

**Figure S2. Sensitivity of *Gaussia princeps* luciferase to ethanol.** *K. lactis* P<sub>350</sub>-Gluc was grown in a fermenter in YDFM containing 2% glucose. After 41.5 h, 1 mL of culture was removed and centrifuged at 13000 x g for 1 min to pellet the cells. The cleared spent medium was diluted 1:20 in phosphate buffered saline (PBS). An aliquot of the dilution (2  $\mu$ L) was added to PBS containing different quantities of ethanol, and Gluc activity was measured. Error bars represent standard deviation from the mean of three technical replicates.

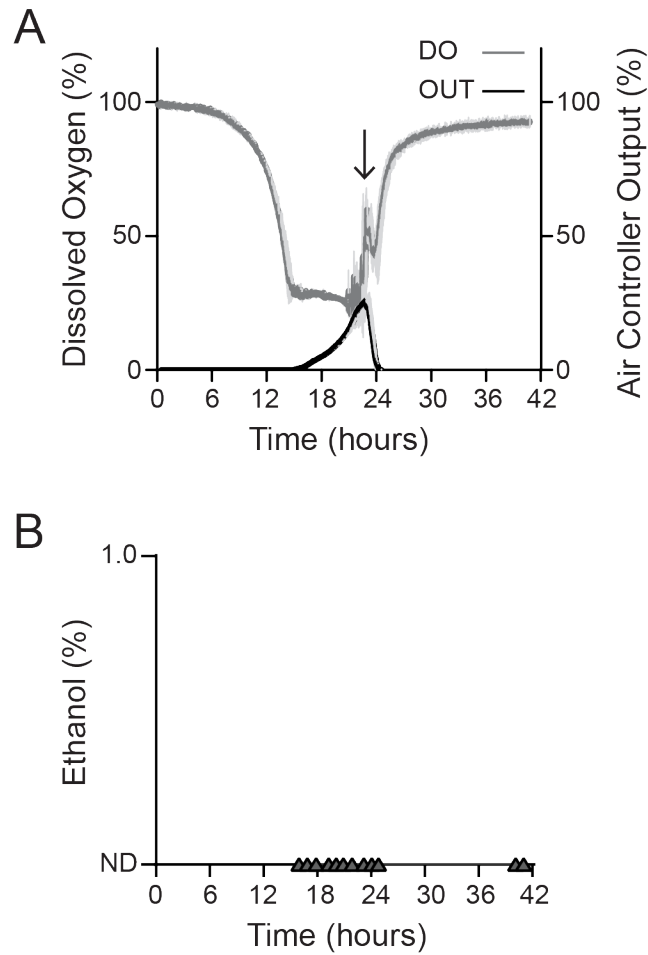

**Figure S3. Additional bioprocessing measurements for *K. lactis* fermentations presented in Figure 5A-B of the main text.** (A) Shown is average oxygen consumption (dark gray line), dissolved oxygen controller output (black line) relative to the time of culturing. The arrow indicates time at which glucose became growth-limiting to the cells. Light grey shading represents standard deviation from the mean of three replicate fermentations. (B) Shown is ethanol production relative to the time of culturing. ND represents the ethanol (<0.05%) detection limit of our instrumentation.

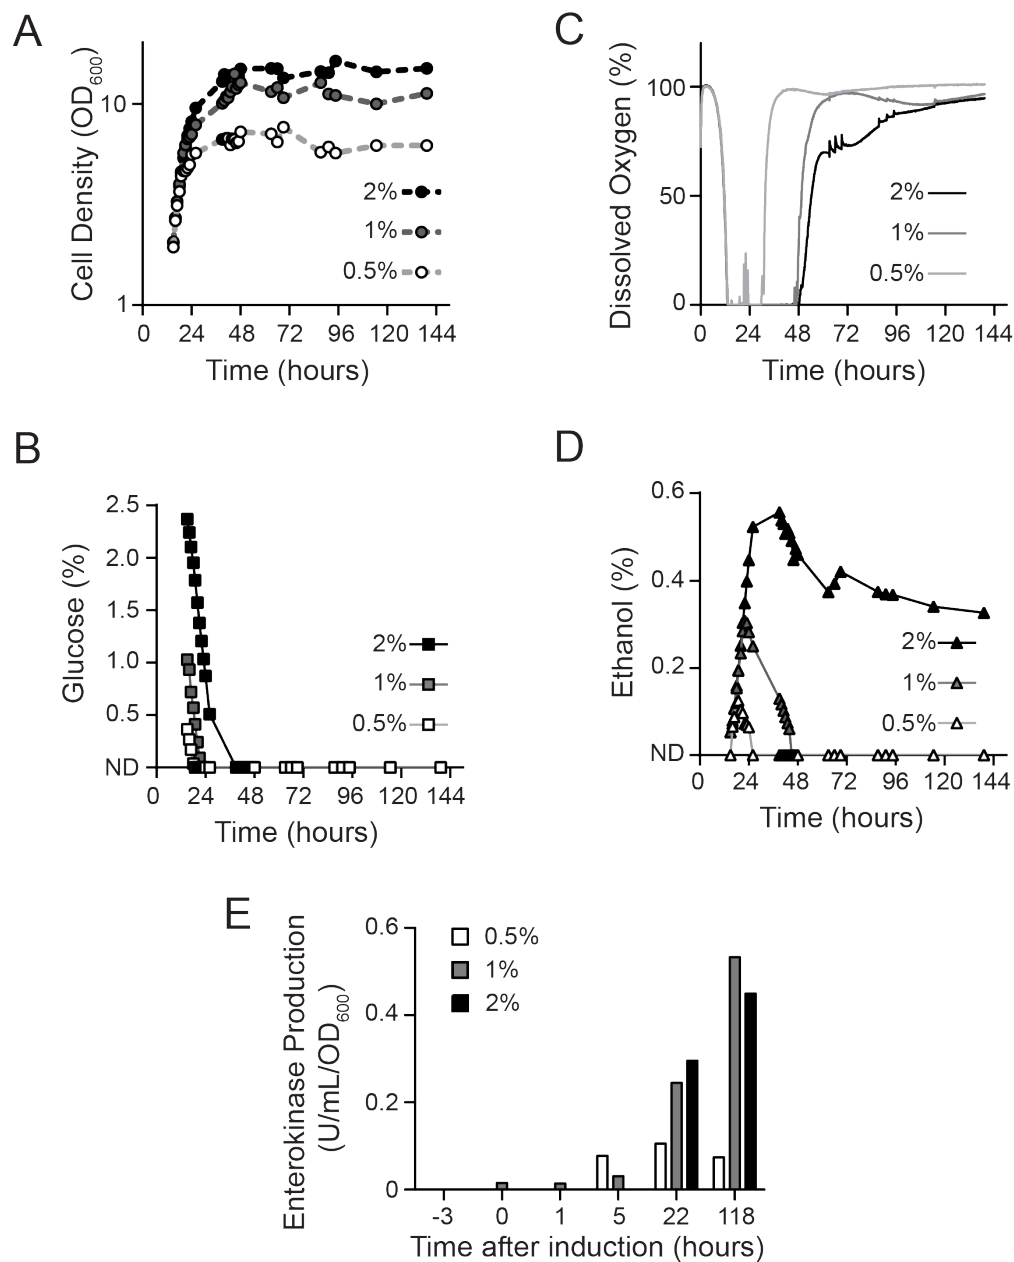

**Figure S4. Shake flask production of enterokinase in growth medium having different glucose concentrations.** Shown are (A) cell growth, (B) glucose consumption, (C) oxygen consumption, and (D) ethanol production, each relative to the time of culturing. (E) Shown is  $EK_L$  production relative to the time at which glucose became depleted and  $P_{350}\text{-}EK_L$  was induced (induction time) in each culture. Enterokinase production was calculated by normalizing  $EK_L$  activity ( $U/mL$ ) to the cell density ( $OD_{600}$ ) of each culture at each timepoint post-induction. In panels B and D, ND represents the glucose ( $<0.002\%$ ) and ethanol ( $<0.05\%$ ) detection limits of our instrumentation. In all panels, light gray lines, grey lines, and black lines represent cultures grown in 0.5%, 1% and 2% glucose, respectively.

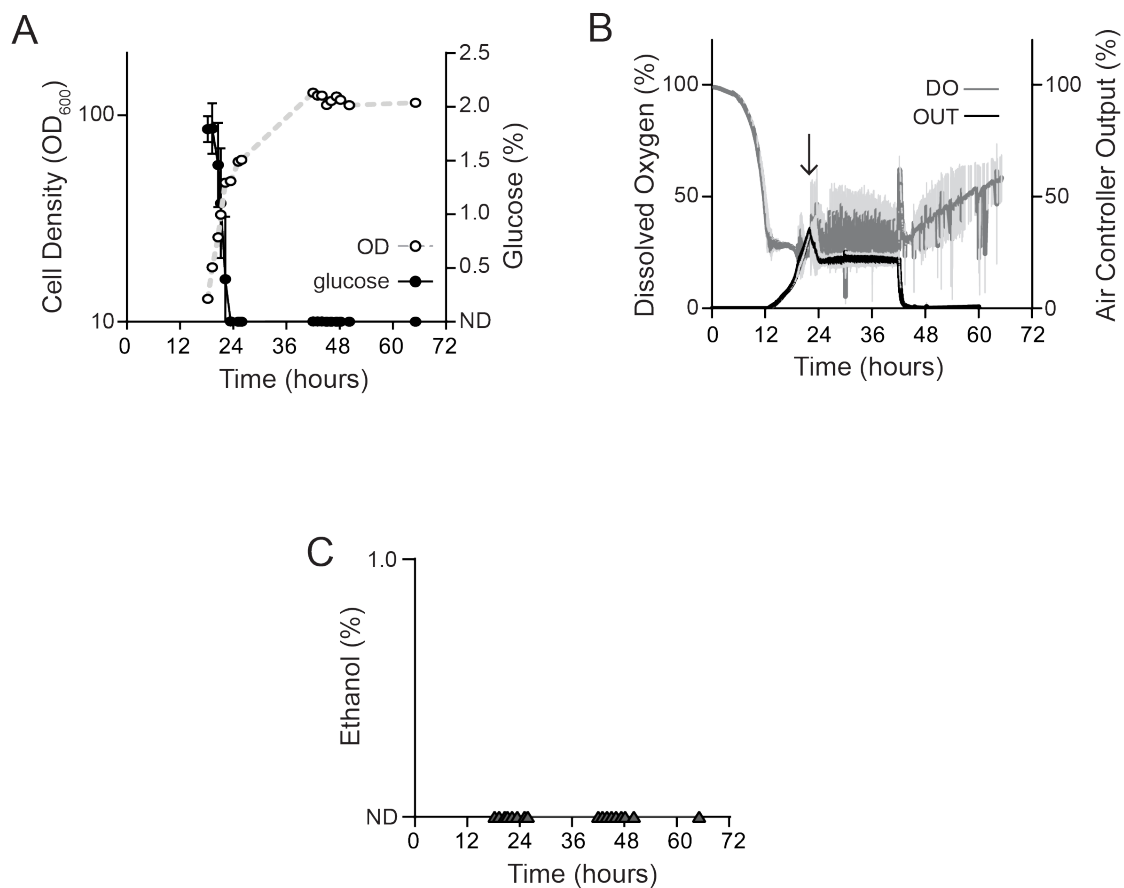

**Figure S5: Additional bioprocessing measurements for *K. lactis* high cell density fermentations presented in Figure 5C of the main text.** Shown are (A) glucose consumption, (B), oxygen consumption, and (C) ethanol production, each relative to the time of culturing. In panel B, dark gray lines represent average dissolved oxygen (DO) and the black line represents average oxygen controller output (OUT) of three replicate cultures. The arrow indicates time at which glucose became growth-limiting to the cells. In panels A and C, ND represents the glucose (<0.002%) and ethanol (<0.05%) detection limits of our instrumentation. In all panels, error bars or light gray shading represents standard deviation from the mean of three replicate fermentations.



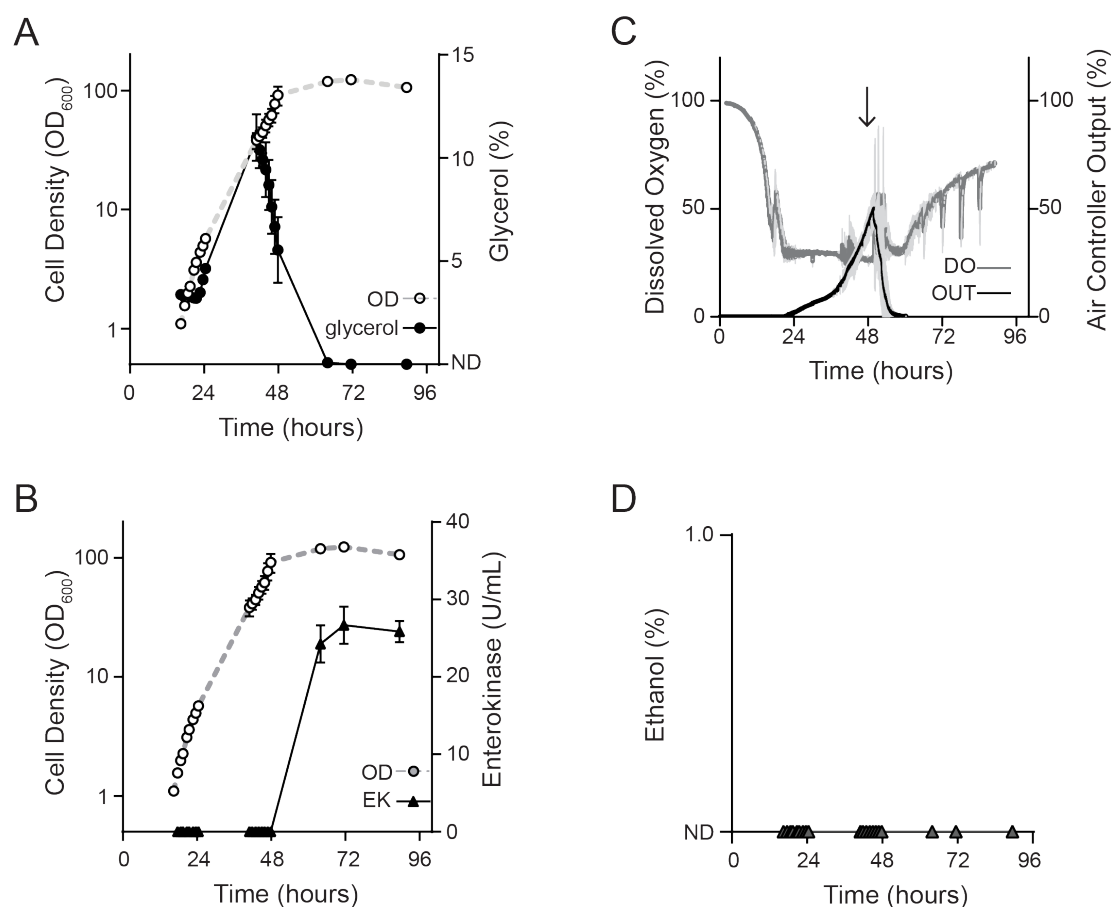

**Figure S6.  $P_{350}$ -dependent production of enterokinase by *K. lactis* YCT1267 grown in high cell density fermentations using glycerol as a carbon source.** Triplicate fermentations of *K. lactis* YCT1267 were performed in bioreactors. A 60% glycerol feed solution containing ampicillin and vitamins was added at a constant rate of 5 mL/h from 22.5 h ( $OD_{600} = \sim 4.3$ ) to 41 h ( $OD_{600} = \sim 38.2$ ) to achieve high cell density. Shown are (A) glycerol consumption, (B)  $EK_L$  activity, (C) oxygen consumption, and (D) ethanol production, each relative to the time of culturing. In panel B, dark gray lines represent average dissolved oxygen (DO) and the black line represents average oxygen controller output (OUT) of the three replicate cultures. The arrow indicates time at which glucose became growth-limiting to the cells. In panels A and D, ND represents the glycerol (<0.0009%) and ethanol (<0.05%) detection limits of our instrumentation. In all panels, error bars or light gray shading represents standard deviation from the mean of three replicate fermentations.
